# Supplementary material for: Senescence induction dictates response to chemo- and immunotherapy in preclinical models of ovarian cancer
Source: PubMed Central journal article supplement (PMC8812522; doi:10.1073/pnas.2117754119), 2022-01-26
Supplement: pnas.2117754119.sapp.pdf [file pnas.2117754119.sapp.pdf]

## Supplementary Figures

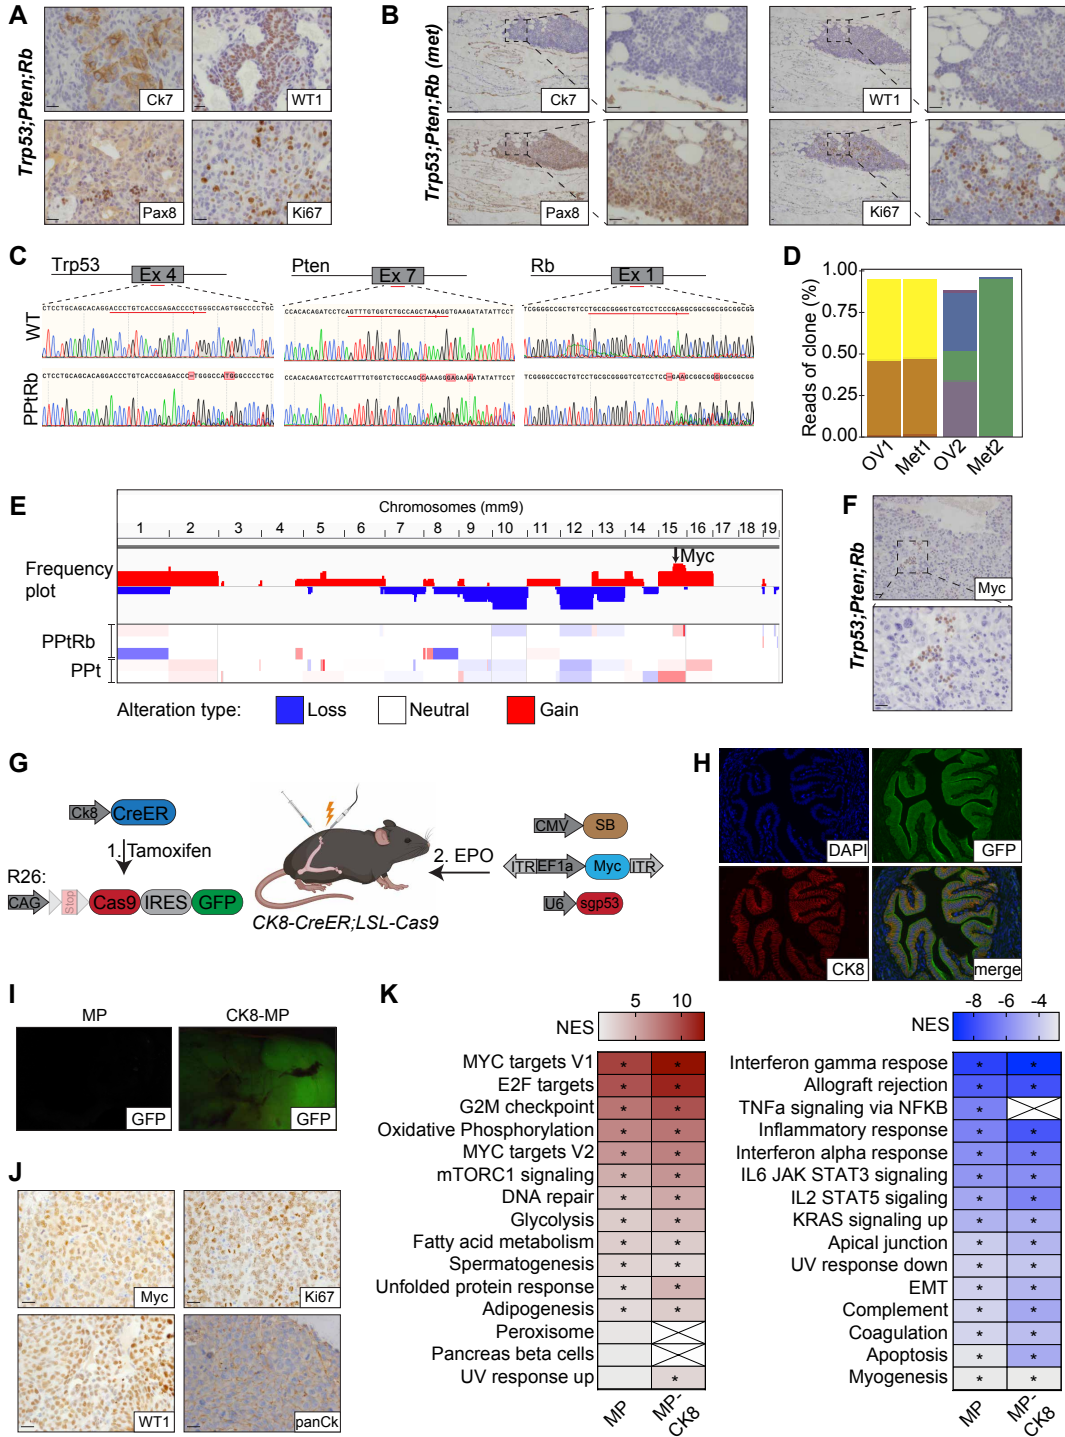

**Figure S1: EPO-GEMM approach generates high-grade serous ovarian cancer that is of epithelial origin. (A-B)** Representative immunohistochemical staining of a *Trp53;Pten;Rb* EPO-GEMM ovarian tumor **(A)** and a corresponding micrometastasis in the omentum **(B)** for the HGSOC markers CK7, WT1, Pax8 and Ki67. Scale bar 20  $\mu$ m. **(C)** Sanger sequencing confirming editing of the respective gene loci targeted by the indicated CRISPR-Cas9-sgRNAs in a *Trp53;Pten;Rb* EPO-GEMM ovarian tumor compared to an unmodified wild-type (WT) tissue. **(D)** Clonality analysis of two representative paired primary tumors (OV) and omentum metastasis (Met). Percentage of reads of the dominant clones was derived by deep sequencing of the *Trp53* amplicon. **(E)** Frequency plot of CNA analysis of *Trp53;Pten;Rb* (PPtRb, n=3) and *Trp53;Pten* (PPt, n=2) EPO-GEMM ovarian tumors. **(F)** Representative immunohistochemical staining of a *Trp53;Pten;Rb* EPO-GEMM ovarian tumor for MYC. Scale bar 20  $\mu$ m. **(G)** Schematic of the EPO-GEMM approach in *CK8-CreER;LSL-Cas9-IRES-GFP* mice. Tamoxifen is given to excise the Stop-cassette to drive Cas9 expression in Ck8-positive cells. A MYC transposon vector, a transposon vector harboring a sgRNA targeting *Trp53* (*sgp53*), and a Sleeping Beauty transposase (SB) are delivered into the ovary of *CK8-CreER-Cas9* mice by direct *in vivo* electroporation. **(H)** Representative immunofluorescence staining of the oviduct of a *CK8-CreER;LSL-Cas9-IRES-GFP* mouse one week after Tamoxifen treatment. **(I)** Macroscopic GFP expression in MP tumors generated by *in vivo* tissue electroporation of a WT mouse (left) or a *CK8-CreER;LSL-Cas9-IRES-GFP* mouse (right). **(J)** Representative immunohistochemical staining of MP EPO-GEMM ovarian tumors generated in *CK8-CreER;LSL-Cas9-IRES-GFP* mice. Scale bar 20  $\mu$ m. **(K)** Comparison of top enriched (left, red) and depleted (right, blue) Hallmark genesets derived from RNA-seq data in MP and CK8-MP EPO-GEMM tumors compared to normal tissue. Star indicates p-value < 0.05.

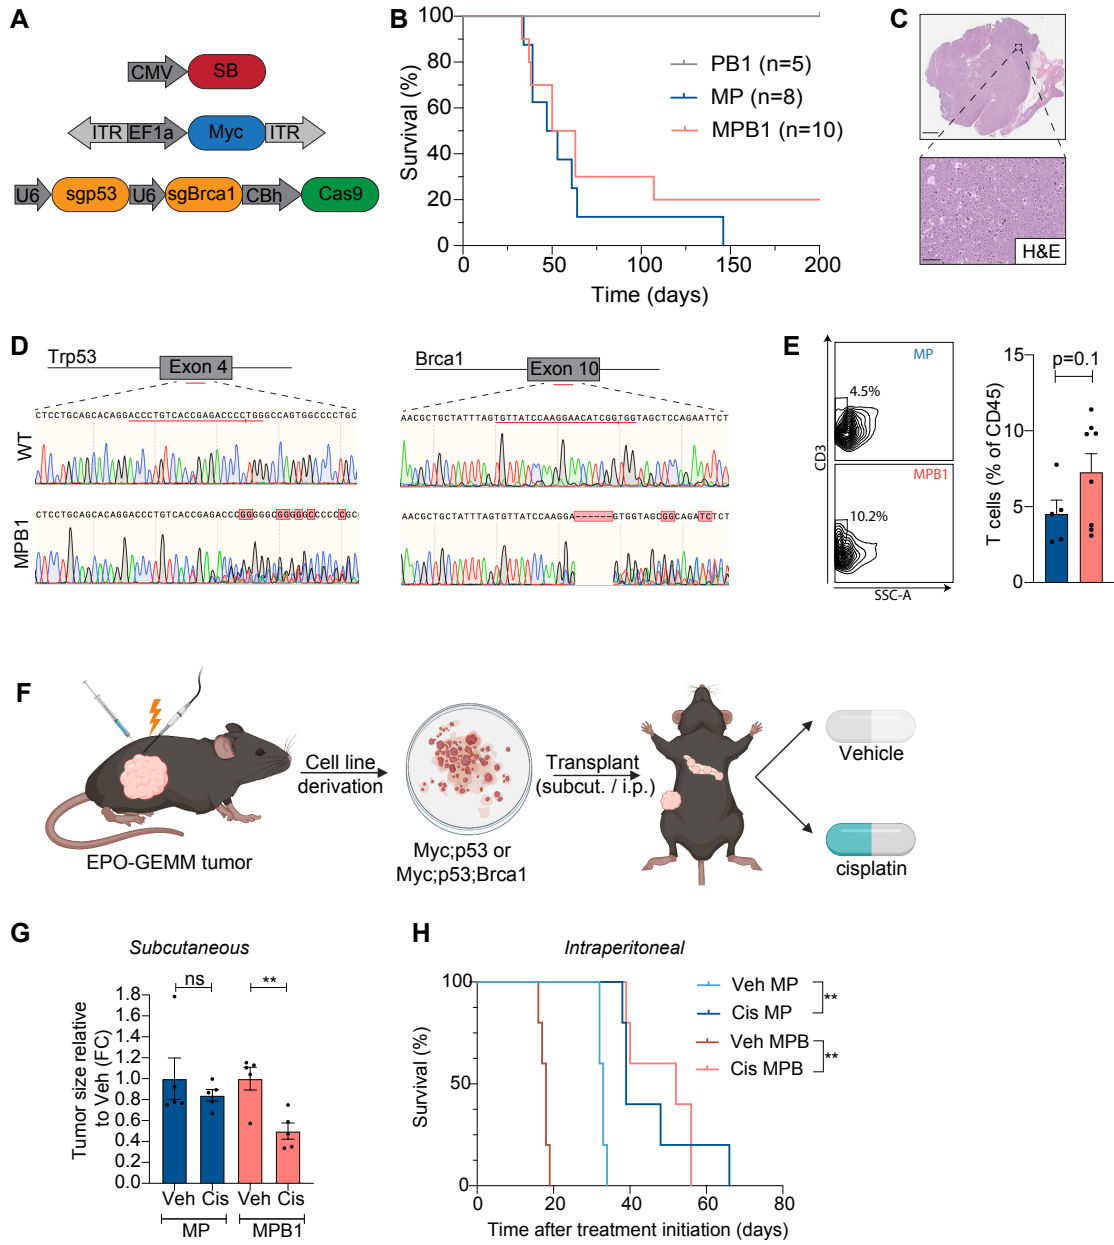

**Figure S2: HR deficiency drives tumors with increased T-cell infiltration and improved therapy response.** (A) Plasmid combination used to induce HR-deficient EPO-GEMM tumors. (B) Kaplan-Meier survival curve of C57BL/6 mice electroporated with the indicated combinations of plasmids. (C) Representative H&E staining of a MPB1 EPO-GEMM tumor. Scale bar 5000  $\mu\text{m}$  (top), 100  $\mu\text{m}$  (bottom). (D) Sanger sequencing confirming editing of the *Trp53* and *Brca1* gene loci targeted by the indicated CRISPR-Cas9 sgRNAs in a MPB1 EPO-GEMM ovarian tumor. (E) Analysis of the T cell infiltrate of representative EPO-GEMM tumors of the indicated genotypes by flow cytometry (n=5-8 mice per group). (F) Schematic of transplantation approach of EPO-GEMM derived cell lines. (G) Relative tumor size of subcutaneously transplanted MP or MPB1 tumor cell lines treated with vehicle or cisplatin (n=5 mice per group). (H) Kaplan-Meier survival curve of mice after i.p. transplantation of MP or MPB1 tumor cell lines and treatment with vehicle or cisplatin (n=5 mice per group). Mice were randomized according to luciferase signal before treatment initiation. \*p  $\leq$  0.05, \*\*p  $\leq$  0.01, \*\*\*p  $\leq$  0.001, ns: not significant; Mean  $\pm$  SEM; Analyses performed using unpaired t test (E, G) and log-rank test (H).

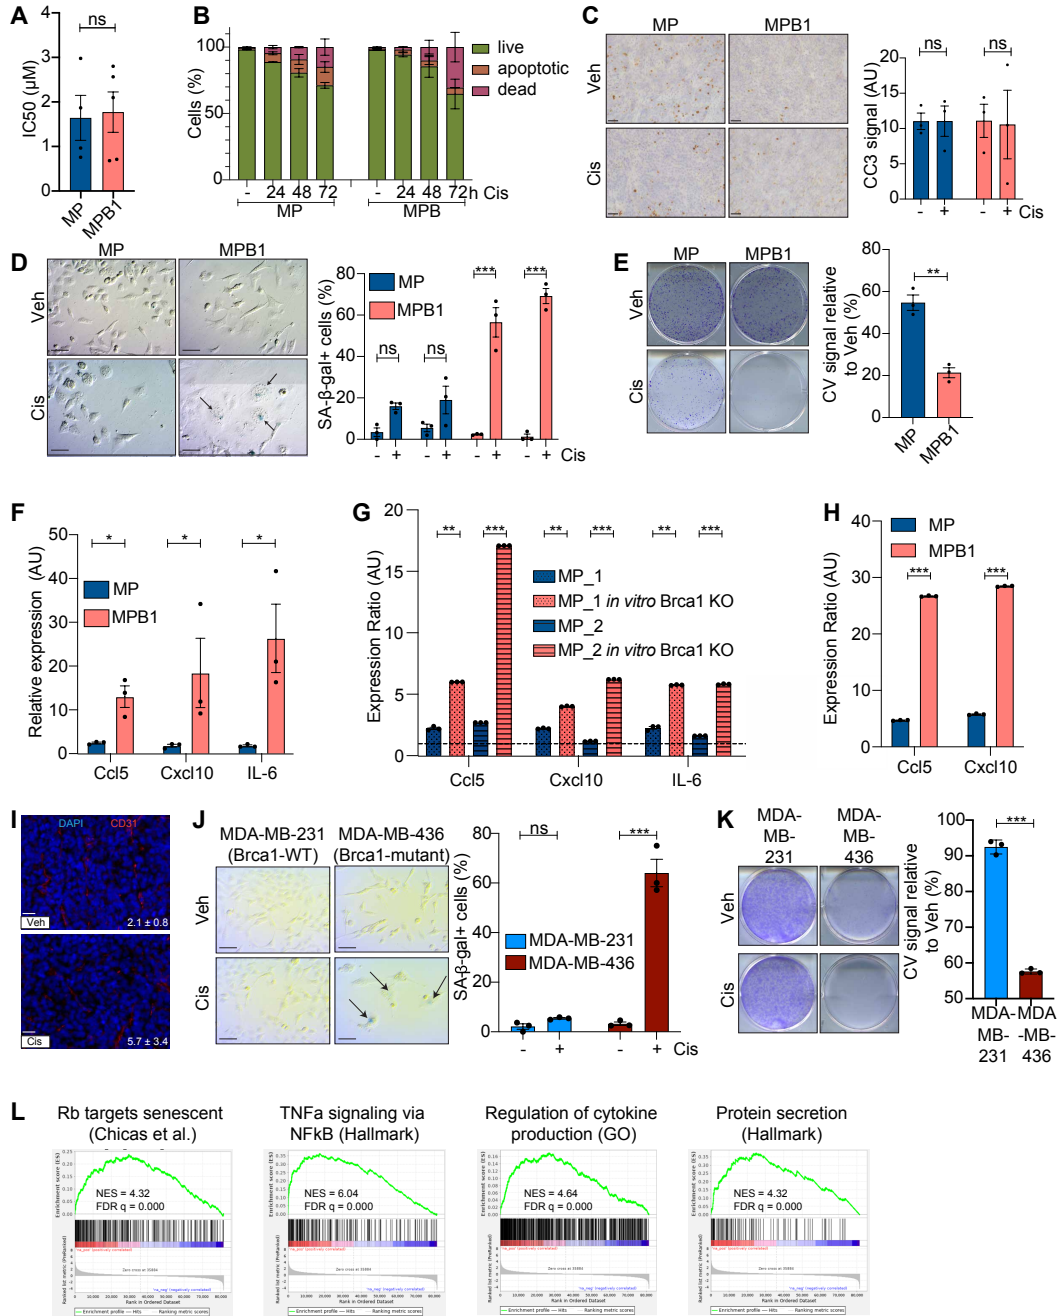

**Figure S3: Chemotherapy treatment induces senescence and SASP in HR-deficient HGSOC.**

(A) IC50 values of MP or MPB1 cell lines treated with cisplatin. Cell viability was calculated relative to vehicle-treated control cells, measured with CellTiter-Glo assay 72h after treatment (n = 4-5). (B) Quantification of live (Annexin-V<sup>-</sup>, PI<sup>-</sup>), apoptotic (Annexin-V<sup>+</sup>, PI<sup>-</sup>) or dead (Annexin-V<sup>+</sup>, PI<sup>+</sup>) cells in MP or MPB1 cell lines after 24, 48 or 72 h of cisplatin treatment (n = 3). (C) Representative

immunohistochemical staining and quantification of cleaved caspase-3 (CC3) signal in subcutaneously transplanted MP or MPB1 ovarian tumors after two cycles of cisplatin treatment (n = 3). Scale bar 40  $\mu$ m. **(D)** SA- $\beta$ -gal staining of cell lines treated with vehicle or 1  $\mu$ M cisplatin for 6 days (n = 2 independent cell lines per genotype with n = 3 technical replicates). Scale bar 50  $\mu$ m. **(E)** Clonogenic crystal violet (CV) assay of MP or MPB1 cells replated in the absence of drugs after 6-day pretreatment as in (D) (n = 3 independent cell lines per genotype). **(F)** RT-qPCR analysis of *Ccl5*, *Cxcl10* and *Il6* in MP or MPB1 cell lines. Expression ratio of cisplatin-treated relative to untreated is shown. Each point represents a cell line derived from a different mouse tumor (n = 3). **(G)** RT-qPCR analysis of *Ccl5*, *Cxcl10* and *Il6* in MP cell lines transfected with control or *Brca1*-targeting sgRNA. Expression ratio of cisplatin-treated relative to untreated is shown. The different patterns represent a cell line derived from a different MP mouse tumor, in which *Brca1* was knocked-out after cell line establishment (n = 3 technical replicates per independent line). **(H)** RT-qPCR analysis of *Ccl5* and *Cxcl10* in MP or MPB1 cell lines treated with 50 nM Taxol. Expression ratio of treated relative to untreated is shown (n = 3). **(I)** IF staining and quantification of CD31<sup>+</sup> blood vessels of transplanted tumors after two cycles of cisplatin treatment (n = 3). Scale bar 20  $\mu$ m. **(J)** SA- $\beta$ -gal staining (left) and quantification (right) of either *BRCA1* wild-type (WT) (MDA-MB-231) or -mutant (MDA-MB-436) human breast cancer cell lines after treatment with vehicle or cisplatin for 6 days (n = 3). Scale bar 50  $\mu$ m. **(K)** Clonogenic crystal violet (CV) assay of human BRCA-WT or -mutant breast cancer cells replated in the absence of drugs after 6-day pretreatment as in (J) (n = 3). **(L)** Gene set enrichment analysis (GSEA) comparing expression of senescence and SASP signatures in patients after and before chemotherapy treatment in a human ovarian cancer dataset (1).

\*p  $\leq$  0.05, \*\*p  $\leq$  0.01, \*\*\*p  $\leq$  0.001, ns: not significant; Mean  $\pm$  SEM; Analyses performed using unpaired t-test (A, C, E-K), one-way ANOVA (D) and Wilcoxon signed-rank test (L).

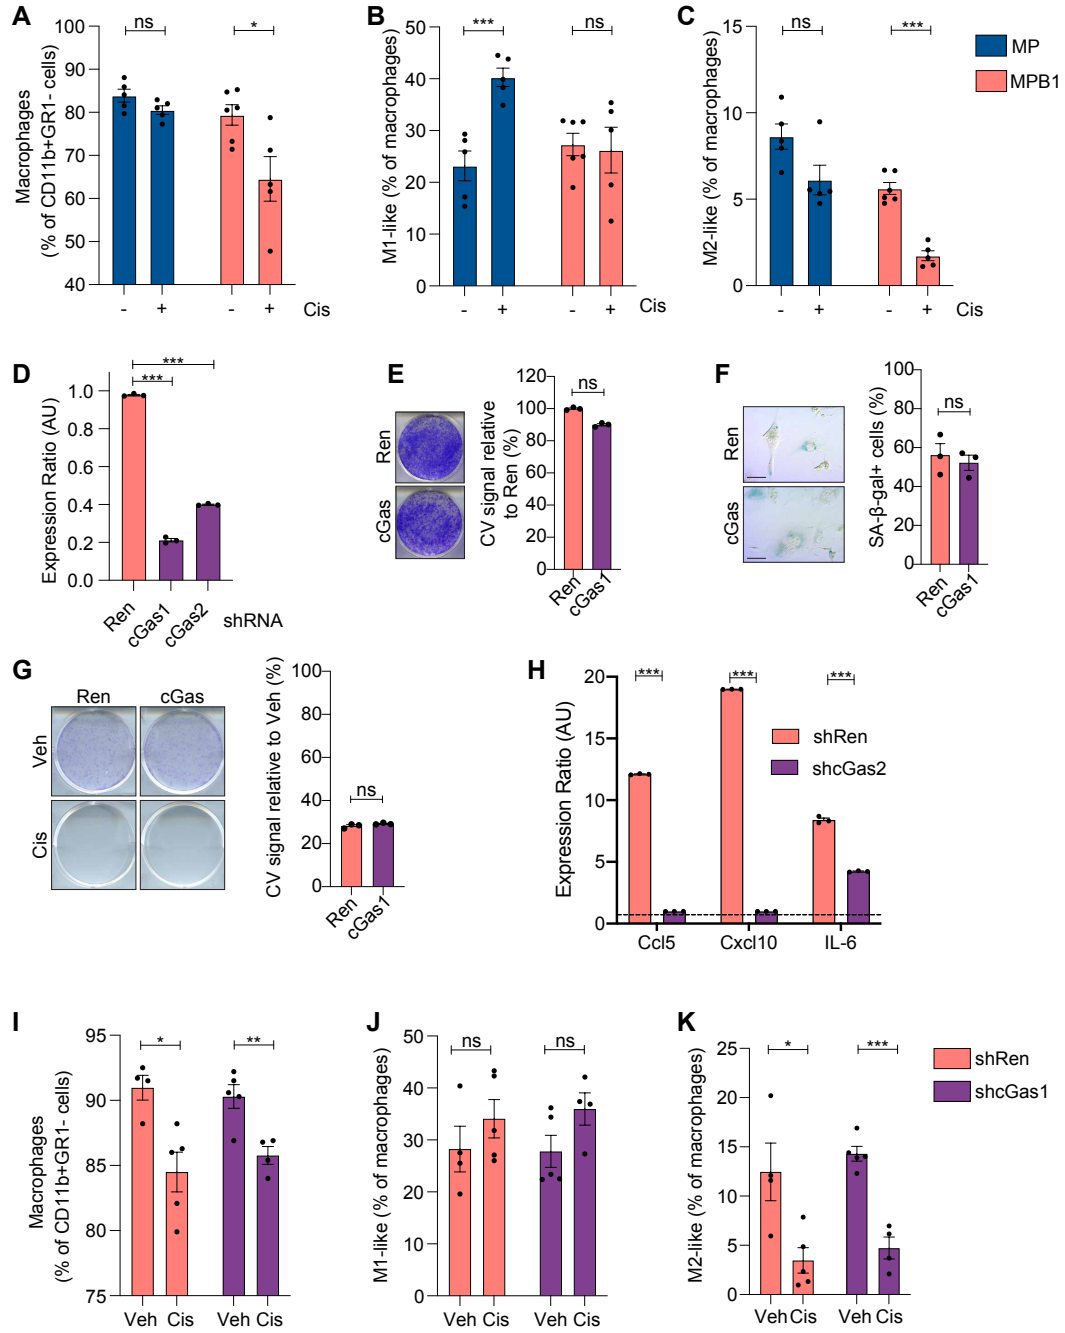

**Figure S4: cGas knockdown does not alter the myeloid immune compartment or cell-intrinsic senescence response. (A-C)** Infiltration of macrophages **(A)** and percentages of M1-like (CD206-, CD80+) **(B)** and M2-like (CD206+, CD80-) **(C)** macrophages in subcutaneously transplanted MP or MPB1 ovarian tumors after treatment with 2 cycles of cisplatin (n = 5-6 mice per group). **(D)** RT-qPCR analysis of cGas in MPB1 cell lines containing control Renilla (shRen) or cGas shRNAs (shcGas) shRNAs targeting (n = 3). **(E)** Clonogenic assay of MPB1 cell lines containing control Renilla (shRen) or cGas (shcGas) shRNAs (n = 3). **(F)** SA- $\beta$ -gal staining of MPB1 cell lines containing control Renilla (shRen) or cGas (shcGas) shRNAs after treatment with vehicle or cisplatin for 6 days (n = 3). Scale bar 20  $\mu$ m. **(G)** Clonogenic crystal violet (CV) assay of MP or MPB1 cells replated in the absence of drugs after 6-day pretreatment as in (F) (n = 3). **(H)** RT-qPCR analysis of *Ccl5*, *Cxcl10* and *Il6* in MPB1 cell lines containing control Renilla (shRen) or cGas (shcGas) shRNAs. Expression ratio of cisplatin-treated relative to untreated is shown (n = 3). **(I-K)** Infiltration of macrophages **(I)** and percentages of M1 **(J)** and M2 **(K)** macrophages in transplanted shRen or shcGas MPB1 ovarian tumors after treatment with 2 cycles of cisplatin (n = 4-5 mice per group).

\*p  $\leq$  0.05, \*\*p  $\leq$  0.01, \*\*\*p  $\leq$  0.001, ns: not significant; Mean  $\pm$  SEM; Analyses performed using unpaired t-test (A-C, E-K) or one-way ANOVA (D).



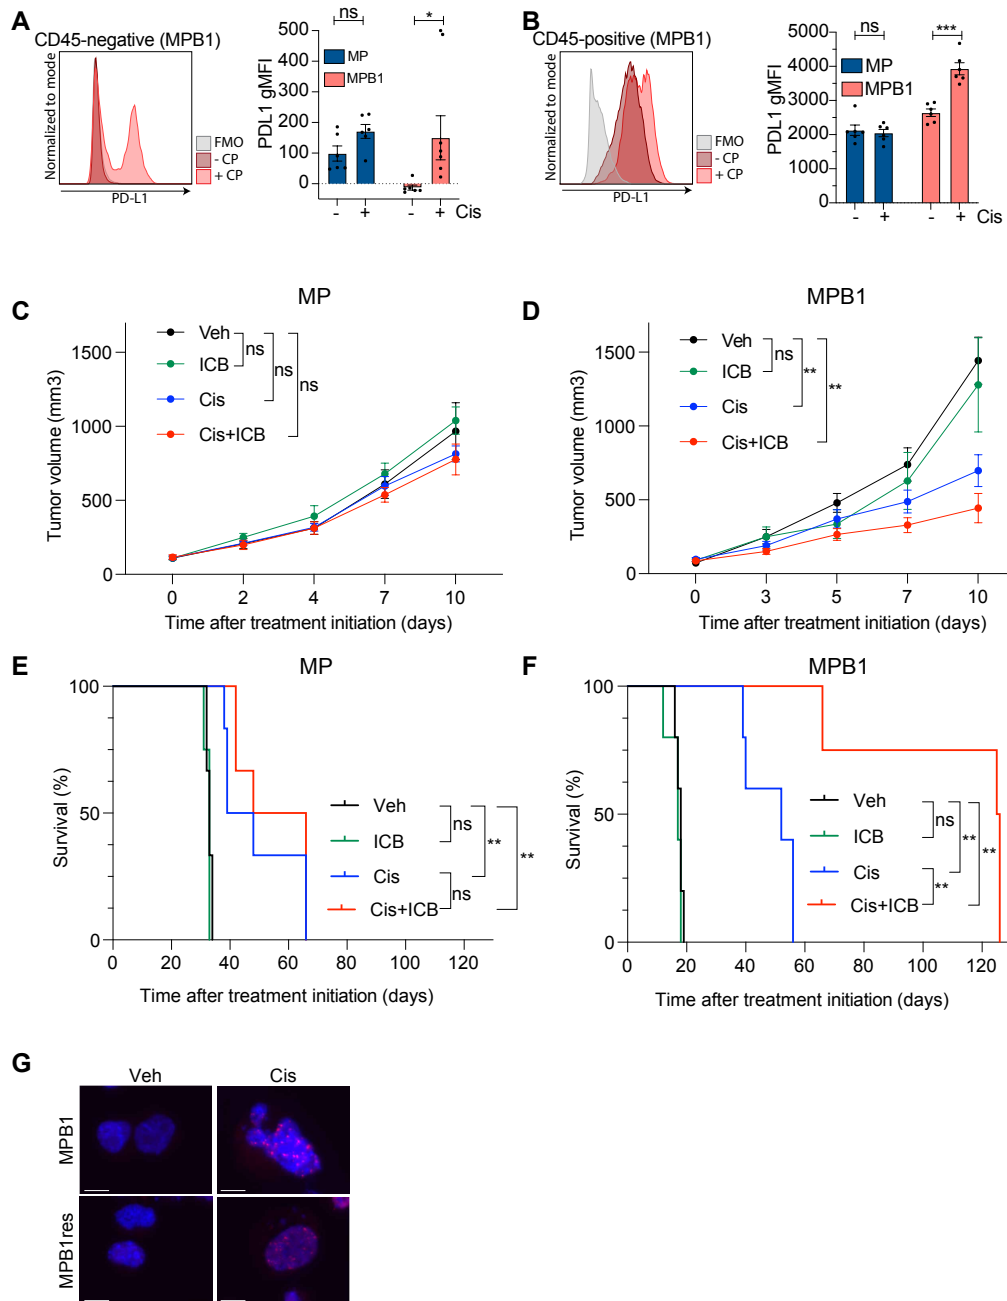

**Figure S5: Treatment response of HR-proficient and -deficient HGSOc after treatment with chemotherapy and ICB. (A+B)** Representative MFI plot (left) and quantification (right) of PD-L1 expression on tumor cells (CD45-negative) **(A)** or immune cells (CD45-positive) **(B)** from subcutaneously transplanted MPB1 ovarian tumors treated with vehicle or cisplatin (n = 5-6 mice per group). **(C+D)** Tumor growth of subcutaneously transplanted MP **(C)** or MPB1 **(D)** tumors treated with vehicle, ICB, cisplatin or cisplatin + ICB (n = 5 mice per group). **(E+F)** Kaplan-Meier survival curve of MP **(E)** or MPB1 **(F)** tumors generated by i.p. injection (n = 4-6 mice per group). Mice were randomized according to luciferase signal before treatment initiation. **(G)** Immunofluorescence staining of 53BP1 foci in MP and MPB1 cell lines treated with vehicle or cisplatin for 72h. Scale bar 10  $\mu$ m.

\*p  $\leq$  0.05, \*\*p  $\leq$  0.01, \*\*\*p  $\leq$  0.001, ns: not significant; Mean  $\pm$  SEM; Analyses performed using unpaired t-test (A-B), one-way ANOVA (C-D) and log-rank test (E-F).

## **Supplementary Methods**

### **Animal studies**

Mice were maintained under specific pathogen-free conditions, and food and water were provided ad libitum. Mice were purchased from Jackson laboratory. CK8-CreER (2) male mice were crossed with LSL-Cas9-IRES-GFP female mice to produce CK8-CreER;LSL-Cas9-IRES-GFP female mice for generation of EPO-GEMMs. All mouse experiments were approved by the Memorial Sloan-Kettering Cancer Center (MSKCC) Internal Animal Care and Use Committee.

### **Ultrasound and bioluminescence imaging**

High-contrast ultrasound imaging was performed on a Vevo 2100 System with a MS250 13- to 24-MHz scanhead (VisualSonics) to stage and quantify ovarian EPO-GEMM tumor burden. Tumor volume was analyzed using Vevo LAB software.

For visualizing ovarian tumor cells with luciferase, luciferase-blasticidin (Luc-Blast) constructs were cloned into MSCV-based vectors and retroviruses were packaged by co-transfection of Gag-Pol expressing 293 T cells with expression constructs and envelope vectors (VSV-G) using the Lipofectamine method (Thermo Fisher). Following transduction, cells were selected with Blasticidin S (10 µg/ml; Life Technologies) for 5 days. Bioluminescence imaging was used to track luciferase expression in tumor cells expressing the Luc-Blast reporter. Mice were injected i.p. with luciferin (5 mg/mouse; Gold Technologies) and then imaged on a Xenogen IVIS Spectrum imager (PerkinElmer) 10 minutes later for 30 s. Quantification of luciferase signaling was analyzed using Living Image software (Caliper Life Sciences).

### **Preclinical drug studies**

For preclinical treatment studies, EPO-GEMM mice were monitored for tumor development by palpation or ultrasound and randomized into treatment groups. For subcutaneous studies, EPO-GEMM derived cell lines were resuspended in Matrigel (BD Biosciences) and injected in the subcutaneous space. Following inoculation, mice were monitored three times a week. Caliper measurements began when tumors became visible. Tumor volume was calculated using the

following formula: tumor volume =  $(D \times d^2)/2$ , in which D and d refer to the long and short tumor diameter, respectively. When tumors reached a size of 100-150 mm<sup>3</sup>, mice were randomized based on starting tumor volume and enrolled into treatment groups. Tumor size and mouse weights were recorded three times weekly. Experimental endpoints were achieved when tumors reached 2000 mm<sup>3</sup> or became ulcerated. For i.p. studies, 1 to 2.5 million cells of EPO-GEMM derived cell lines carrying a luciferase reporter were resuspended in PBS and injected into the i.p. space in a volume of 200  $\mu$ l. Tumor volume was monitored using IVIS imaging and mice were randomized based on starting tumor signal.

Mice were treated with vehicle or cisplatin (3 mg/kg body weight) by i.p. injection once a week. Anti-PD-1 antibody (200mg/mouse; RMP1-14, BioXCell) was given 3 times per week i.p. alone or in combination with cisplatin. No obvious toxicities were observed in vehicle- or drug-treated animals as assessed by changes in body weight. Upon sacrifice, ovarian tumor tissue was allocated to either 10% formalin fixation, flow cytometry analysis on fresh tissue or snap frozen for DNA/RNA analysis.

### **DNA constructs for electroporation**

The Sleeping Beauty transposase (SB13) and the pT3 transposon vector were a generous gift of Dr. Xin Chen, UCSF San Francisco. The pX330 vector was a gift from Feng Zhang (Addgene plasmid # 42230). Table S2 provides the sgRNA sequences used in this study.

### **Clonality analysis of EPO-GEMM tumors**

Genomic DNA was isolated from EPO-GEMM tumors using QIAGEN DNeasy Blood and Tissue kit following manufacturer's instructions. The p53 locus was amplified using a 50  $\mu$ l reaction following standard Q5 High Fidelity Master Mix (NEB) protocol (forward primer: CAGAAGATATCCTGGTAAGG, reverse primer: CTACAGGCTGAAGAGGAACC). Amplicons were confirmed on a 2% agarose gel and PCR purified using QIAGEN QIAquick PCR purification kit. DNA concentration were measured using Nanodrop and samples were normalized to 20 ng/ $\mu$ l

and sequenced using EZ-amplicon sequencing (MiSeq, 2 x 250 bp by GENEWIZ, Inc, South Plainfield, NJ, USA).

### **CNA inference**

1 µg of bulk genomic DNA (gDNA) was extracted from ovarian tumors and tissue using the DNeasy Blood & Tissue Kit (Qiagen) and sonicated using the Covaris instrument. Sonicated DNA was subsequently end-repaired/A-tailed, followed by ligation of TruSeq dual indexed adaptors. Indexed libraries were enriched via PCR and sequenced in multiplex fashion using the Illumina HiSeq2500 instrument to achieve roughly 1 million uniquely mappable reads per sample – a read count sufficient to allow copy number inference to a resolution of approximately 400kb. For data analysis, uniquely mapped reads were counted in genomic bins corrected for mappability. Read counts were subsequently corrected for GC content, normalized, and segmented using Circular Binary Segmentation (CBS). Segmented copy number calls are illustrated as relative gains and losses to the median copy number of the entire genome.

### **Tumor RNA-sequencing (RNA-seq)**

For RNA-seq analysis of the transcriptional profiles of EPO-GEMM ovarian tumors, as well as normal ovaries of WT C57BL/6 mice, total RNA was extracted from bulk tissue using the RNeasy Mini Kit (Qiagen). Purified polyA mRNA was subsequently fragmented, and first and second strand cDNA synthesis performed using standard Illumina mRNA TruSeq library preparation protocols. Double stranded cDNA was subsequently processed for TruSeq dual-index Illumina library generation. For sequencing, pooled multiplexed libraries were run on a HiSeq 2500 machine on RAPID mode. Approximately 10 million 76bp single-end reads were retrieved per replicate condition. Resulting RNA-seq data was analyzed by removing adaptor sequences using Trimmomatic (3), aligning sequencing data to GRCm38.91(mm10) with STAR (4), and genome wide transcript counting using featureCounts (5) to generate a TPM matrix of transcript counts. Genes were identified as differentially expressed using R package DESeq2 with a cutoff of absolute  $\log_2(\text{fold change}) \geq 1$  and adjusted p-value  $< 0.05$  between experimental conditions (6).

### **Clustering and Gene Set Enrichment Analysis (GSEA)**

Principal component analysis was performed using the DESeq2 package in R. Gene expressions of RNA-seq data were clustered using hierarchical clustering based on one minus Pearson correlation test. For pathway enrichment analysis, the weighted GSEA Preranked mode was used on a set of curated signatures in the molecular signatures database (<http://www.broadinstitute.org/gsea/msigdb/index.jsp>, MSigDB v7.0). From 22,596 signatures, signatures with 15-500 genes were considered for further analyses. From the results, enriched signatures with an adjusted p-value less than 0.05 were considered as statistically significant. Hallmark and Kegg pathways were used to run GSEA on our murine EPO-GEMM models and human patient data (7), and  $-\log_{10}(\text{FDR})$  values were plotted in the XY plot.

### **Immunohistochemistry and immunofluorescence**

Tissues were fixed overnight in 10% formalin, embedded in paraffin, and cut into 5  $\mu\text{m}$  sections. Haematoxylin and eosin (H&E), immunohistochemical and immunofluorescence stainings were performed using standard protocols. Sections were de-paraffinized, rehydrated, and boiled in a microwave for 15 minutes in 10 mM citrate buffer (pH 6.0) for antigen retrieval. Antibodies were incubated overnight at 4°C. Primary antibodies are listed in Table S3. HRP-conjugated secondary antibodies (Vectastain Elite ABC HRP Kits) were applied for 30 minutes and visualized with DAB (Vector Laboratories; SK-4100), or secondary Alexa Fluor 488 or 594 dye-conjugated antibodies (Life Technologies) applied for 1 hour at room temperature. Fluorescence antibody-labeled slides were mounted with Prolong Gold Antifade mountant (Prolong Molecular Probes; P36934) after counterstaining with DAPI.

### **In vitro cell assays**

For knockdown studies, two independent MiRE-based shRNAs targeting *cGas* (shcGas1: CGAAGAAGTTAAAGAAATCAAA, shcGas2: CTCGAAGAAAATTGAATATGAA) were cloned into MSCV-based vectors as described previously (8). An shRNA targeting *Renilla* was used as a

control (9). Following transduction with shRNA retroviral constructs, cell selection was performed with 4 µg/mL puromycin for 3 days. Knockdown efficiency was evaluated by RT-qPCR.

For cell viability assays, two thousand cells were plated in 100 µl of media per well of a black-walled 96-well plate (Perkin Elmer). The next day, media was changed, and cells were treated with drugs for 72 hours. Following treatment, cell viability was assessed using the CellTiter-Glo Viability Assay (Promega) according to the manufacturer's protocol. IC<sub>50</sub> calculations were made using Prism 6 Software (GraphPad Software). Drugs for *in vitro* studies were dissolved in DMSO. Growth medium with vehicle or drugs was changed every 3 days.

For drug withdrawal assays, cells were pretreated for 5-7 days with vehicle (DMSO) or cisplatin, and then replated (5 x 10<sup>3</sup> cells per well of 6-well plate) in the absence of drugs for 5 to 7 days. Relative growth was quantified with Crystal Violet staining.

#### **Senescence-associated beta-galactosidase staining**

Senescence-associated beta-galactosidase (SA-β-gal) staining was performed as previously described at pH 5.5 for mouse cells and tissue and pH 6 for human cells (10). Fresh frozen ovarian tumor sections, or adherent cells plated in 6-well plates, were fixed with 0.5% glutaraldehyde in PBS for 15 minutes, washed with PBS supplemented with 1mM MgCl<sub>2</sub>, and stained for 18-24 hours in PBS containing 1 mM MgCl<sub>2</sub>, 1 mg/ml X-Gal, and 5 mM each of potassium ferricyanide and potassium ferrocyanide. Tumor tissue sections were counterstained with eosin. For the fluorescent SA-β-gal labelling, frozen sections were incubated in 300 µM chloroquine solution for 30 minutes at 37°C followed by exposure to the C12RG substrate (ImaGene Red C12RG *lacZ* Gene Expression Kit, Molecular Probes, I2906) for 2 hours at 37°C. The reaction was stopped by addition of 1 µM PETG. Slides were fixed with 4% PFA for 10 minutes at room temperature. 5 high power fields per well/section were counted and averaged to quantify the percentage of SA-β-gal<sup>+</sup> cells.

#### **Cytokine array**

EPO-GEMM derived ovarian cancer cell lines were plated in 6-well plates and treated for 48h with vehicle or cisplatin at IC<sub>50</sub> concentrations. Conditioned media was collected, and the cells were

trypsinized and counted using a cellometer (Nexcelom Biosciences). Conditioned media samples were normalized based on cell number by diluting with complete DMEM. 50 µl aliquots of the conditioned media were analyzed using multiplex immunoassays (Mouse Cytokine/Chemokine Array 31-Plex) from Eve Technologies. Biological replicates were averaged to determine cytokine levels.

### **Micronuclei quantification**

Cells were seeded on chamber slides. Following vehicle or cisplatin treatment, the cells were washed and fixed in 4% formaldehyde/PBS for 10 minutes at room temperature. For confocal microscopy, cells were mounted on coverslips using ProLong Gold antifade reagent with DAPI counterstaining (#P36935, Life Technologies). Images were analyzed using ImageJ/Fiji software.

### **Rad51 assay**

Cells were irradiated with a 10 Gy dose of ionizing radiation (IR) and allowed to recover for 4 hr. Cells were fixed with 4% solution of formaldehyde in PBS for 30 min and permeabilized in 0.2% Triton X-100 in PBS<sup>++</sup> (PBS solution containing 1 mM CaCl<sub>2</sub> and 0.5 mM MgCl<sub>2</sub>) for 20 min. For blocking, cells were incubated for 30 min in staining buffer (1% BSA, 0.15% glycine and 0.1% Triton X-100 in PBS<sup>++</sup>). Cells were incubated with primary RAD51 antibody (70-001, BioAcademia, 1:5000) in staining buffer for 2h at room temperature followed by incubation of fluorophore-conjugated secondary antibody for 1h at room temperature. Samples were mounted with Prolong Gold Antifade mountant (Prolong Molecular Probes; P36934) after counterstaining with DAPI. RAD51 foci were quantified with ImageJ/Fiji software.

### **Flow Cytometry**

To prepare single cell suspensions for flow cytometry analysis, tumors were minced with a razorblade into small pieces and placed in 5 ml of pre-warmed collagenase buffer (1x HBSS with calcium and magnesium (GIBCO), 2 mg/ml Collagenase D (11088858001; Sigma), 0.1 mg/ml DNase I (DN25; Sigma)). Samples were then transferred to C tubes and processed using program



37C\_m\_TDK1\_1 on a gentleMACSC Octo dissociator with heater (Miltenyi Biotec). Dissociated tissue was filtered through a 70  $\mu\text{m}$  cell strainer and centrifuged at 1500 rpm for 5 minutes. Samples were resuspended in FACS buffer (1x PBS, 2% FBS, 2 mM EDTA) and  $3 \times 10^6$  cells were seeded in a U-bottom 96-well plate. Samples were blocked with anti-CD16/32 (FC block, BD Pharmigen) for 10 minutes and then incubated with antibodies for 30 minutes on ice. In each experiment, a myeloid and a lymphoid panel were set up. The antibodies used for flow cytometry are provided in Table S4 and S5. Gates were set using fluorescence minus one (FMO) controls. Flow cytometry was performed on a LSR Fortessa or LSR II flow cytometer, and data were analyzed using FlowJo (TreeStar).

### **RT-qPCR**

Total RNA was extracted from cell lines treated with vehicle or cisplatin for 48h using the RNeasy Mini Kit (QIAGEN). Complementary DNA (cDNA) was obtained using the TaqMan reverse transcription reagents (Applied Biosystems). Real-time quantitative PCR was performed in duplicate or triplicate using SYBR Green PCR Master Mix (Applied Biosystems) on the ViiA 7 Real-Time PCR System (Invitrogen). Expression was calculated using the  $\Delta\Delta\text{Ct}$  method, *Gapdh* served as an endogenous normalization control. Table S6 indicates the primer sequences used for RT-qPCR.

### **Figure Preparation**

Figures were prepared using BioRender.com for scientific illustrations and Illustrator CC 2020 (Adobe).

**Supplementary Table S1: Overview of electroporation plasmid mixes**

| <b>Mouse Strain</b>         | <b>Plasmid Mix</b>                                                                                                   | <b>Genotype</b> |
|-----------------------------|----------------------------------------------------------------------------------------------------------------------|-----------------|
| WT C57BL/6                  | 20 µg sg <i>Trp53</i> /sg <i>Pten</i> Cas9 pX330 vector<br>20 µg sg <i>Rb</i> Cas9 pX330 vector                      | PPtRb           |
| WT C57BL/6                  | 20 µg sg <i>Trp53</i> / <i>Pten</i> Cas9 pX330 vector                                                                | PPt             |
| WT C57BL/6                  | 20 µg sg <i>Trp53</i> Cas9 pX330 vector                                                                              | p53_only        |
| WT C57BL/6                  | 1 µg SB13 transposase<br>5 µg <i>MYC</i> transposon vector<br>20 µg sg <i>Trp53</i> Cas9 pX330 vector                | MP              |
| WT C57BL/6                  | 1 µg SB13 transposase<br>5 µg <i>MYC</i> transposon vector<br>20 µg sg <i>Trp53</i> / <i>Brca1</i> Cas9 pX330 vector | MPB1            |
| CK8-CreER;LSL-Cas9-IRES-GFP | 1 µg SB13<br>5 µg <i>MYC</i> transposon vector<br>20 µg sg <i>Trp53</i> vector                                       | CK8-MP          |

**Supplementary Table S2: sgRNA sequences**

| <b>Gene</b> | <b>sgRNA sequence</b> |
|-------------|-----------------------|
| p53         | ACCCTGTCACCGAGACCCC   |
| Pten        | GTTTGTGGTCTGCCAGCTAA  |
| Rb          | TGCGCGGGGTCGTCCTCCCG  |
| Brca1_1     | TGTTATCCAAGGAACATCGG  |
| Brca1_2     | GCAGCAGGAAATGGCTCACC  |

**Supplementary Table S3: Primary antibodies for IHC and IF**

| <b><i>Antigen</i></b> | <b><i>Manufacturer and catalogue number</i></b> |
|-----------------------|-------------------------------------------------|
| MYC                   | Abcam AB32072                                   |
| Wilms-Tumor 1         | Abcam AB89901                                   |
| Cytokeratin-7         | Abcam AB181598                                  |
| Granzyme B            | Abcam AB4059                                    |
| Ki67                  | Abcam AB16667                                   |
| Cancer antigen 125    | Abbiotec 250566                                 |
| Pax8                  | Proteintech 10336                               |
| CD8                   | Ebioscience 4SM15                               |
| Cleaved Caspase3      | Cell Signaling 9664                             |
| $\gamma$ H2AX         | Millipore JBW301                                |
| 53BP1                 | Novus Biologicals NB100-305                     |

**Supplementary Table S4: Antibodies used for flow cytometry analysis (myeloid panel)**

| <b><i>Antigen</i></b> | <b><i>Fluorophore</i></b> | <b><i>Company</i></b> | <b><i>Clone #</i></b> | <b><i>Catalogue #</i></b> |
|-----------------------|---------------------------|-----------------------|-----------------------|---------------------------|
| CD45                  | AF700                     | Biolegend             | 30-F11                | 103128                    |
| CD3                   | BUV737                    | BD                    | 17A2                  | 612803                    |
| Ly6G                  | BV605                     | BD                    | 1A8                   | 563005                    |
| SIGLECF               | PerCp-Cy5.5               | BD                    | E50-2440              | 565526                    |
| LY6C                  | APC-C7                    | Biolegend             | HK1.4                 | 128026                    |
| CD11b                 | BUV395                    | BD                    | M1/70                 | 563553                    |
| CD11c                 | BV785                     | Biolegend             | N418                  | 117335                    |
| MHCII                 | AF488                     | Biolegend             | M5/114.15.2           | 107616                    |
| F4/80                 | PE-eFluor610              | ThermoFisher          | BM8                   | 61-4801-82                |
| CD19                  | BV650                     | BD                    | 1D3                   | 563235                    |
| CD103                 | PE                        | Biolegend             | 2E7                   | 121405                    |
| PD-L1                 | APC                       | Biolegend             | 10F.9G2               | 124312                    |
| CD80                  | BV421                     | Biolegend             | 16-10A1               | 104725                    |
| CD206                 | BV711                     | Biolegend             | C068C2                | 141727                    |
| Viability             | eFluor506                 | ThermoFisher          | -                     | 65-0866-18                |

**Supplementary Table S5: Antibodies used for flow cytometry analysis (lymphoid panel)**

| <i>Antigen</i> | <i>Fluorophore</i> | <i>Company</i> | <i>Clone #</i> | <i>Catalogue #</i> |
|----------------|--------------------|----------------|----------------|--------------------|
| CD45           | AF700              | Biologend      | 30-F11         | 103128             |
| CD3            | AF488              | Biologend      | 17A2           | 100210             |
| CD4            | BUV395             | BD             | GK1.5          | 563790             |
| CD8            | PECy7              | Biologend      | 53-6.7         | 100722             |
| CD25           | BV605              | Biologend      | PC61           | 102035             |
| CD69           | Percp-Cy5.5        | Biologend      | H1.2F3         | 104522             |
| CD62L          | BV421              | BD             | MEL-14         | 562910             |
| CD44           | ApC-Cy7            | BD             | IM7            | 560568             |
| PD1            | PE                 | Biologend      | 29F.1A12       | 135206             |
| NK1.1          | APC                | Biologend      | PK136          | 108710             |
| TIM3           | BV711              | Biologend      | RMT3-23        | 119727             |
| LAG3           | BV650              | Biologend      | C9B7W          | 125227             |
| KLRG1          | BV785              | Biologend      | 2F1            | 138429             |
| Viability      | eFluor506          | ThermoFisher   | -              | 65-0866-18         |

**Supplementary Table S6: Primer sequences used for RT-qPCR**

|           |                         |
|-----------|-------------------------|
| cGas_Fw   | GAGGCGCGGAAAGTCGTAA     |
| cGas_Rv   | TTGTCCGGTTCCTTCCTGGA    |
| Ccl5_Fw   | ATATGGCTCGGACACCACTC    |
| Ccl5_Rv   | TCCTTCGAGTGACAAACACG    |
| Cxcl10_Fw | CCCACGTGTTGAGATCATTG    |
| Cxcl10_Rv | GTGTGTGCGTGGCTTCACT     |
| IL6_Fw    | ACCAGAGGAAATTTTCAATAGGC |
| IL6_Rv    | TGATGCACTTGCAGAAAACA    |

## Supplementary References

1. A. Jiménez-Sánchez *et al.*, Unraveling tumor–immune heterogeneity in advanced ovarian cancer uncovers immunogenic effect of chemotherapy. *Nature Genetics*, 1–21 (2020).
2. A. Van Keymeulen *et al.*, Distinct stem cells contribute to mammary gland development and maintenance. *Nature*. **479**, 189–193 (2011).
3. A. M. Bolger, M. Lohse, B. Usadel, Trimmomatic: a flexible trimmer for Illumina sequence data. *Bioinformatics*. **30**, 2114–2120 (2014).
4. A. Dobin *et al.*, STAR: ultrafast universal RNA-seq aligner. *Bioinformatics*. **29**, 15–21 (2012).
5. S. Anders, P. T. Pyl, W. Huber, HTSeq—a Python framework to work with high-throughput sequencing data. - PubMed - NCBI. *Bioinformatics*. **31**, 166–169 (2015).
6. M. I. Love, W. Huber, S. Anders, Moderated estimation of fold change and dispersion for RNA-seq data with DESeq2. *Genome Biol.* **15**, 1–21 (2014).
7. O. M. T. Pearce *et al.*, Deconstruction of a Metastatic Tumor Microenvironment Reveals a Common Matrix Response in Human Cancers. *Cancer Discovery*. **8**, 304–319 (2018).
8. A. Chicas *et al.*, Dissecting the Unique Role of the Retinoblastoma Tumor Suppressor during Cellular Senescence. *Cancer Cell*. **17**, 376–387 (2010).
9. M. Saborowski *et al.*, A modular and flexible ESC-based mouse model of pancreatic cancer. *Genes Dev.* **28**, 85–97 (2014).
10. V. Krizhanovsky *et al.*, Senescence of activated stellate cells limits liver fibrosis. *Cell*. **134**, 657–667 (2008).
